# Supplementary material for: One-pot hydrothermal synthesis of octahedral CoFe/CoFe2O4 submicron composite as heterogeneous catalysts with enhanced peroxymonosulfate activity
Source: Royal Society of Chemistry journal article supplement (doi:10.1039/c6ta02126c), 2016-01-01
Supplement: c6ta02126c1.pdf [file c6ta02126c1.pdf]

## **Electronic Supporting Information for**

# **One-pot hydrothermal synthesis of octahedral CoFe/CoFe<sub>2</sub>O<sub>4</sub> submicron composite as heterogeneous catalysts with enhanced peroxymonosulfate activity**

Haiming Sun, Xijia Yang, Lijun Zhao\*, Tianhao Xu, Jianshe Lian\*

Key Laboratory of Automobile Materials (Jilin University), Ministry of Education and  
School of Materials Science and Engineering, Jilin University, Changchun 130022, China.

\*Corresponding author:

Name: Dr. Lijun Zhao and Dr. Jianshe Lian

E-mail: [lijunzhao@jlu.edu.cn](mailto:lijunzhao@jlu.edu.cn); [lianjs@jlu.edu.cn](mailto:lianjs@jlu.edu.cn)

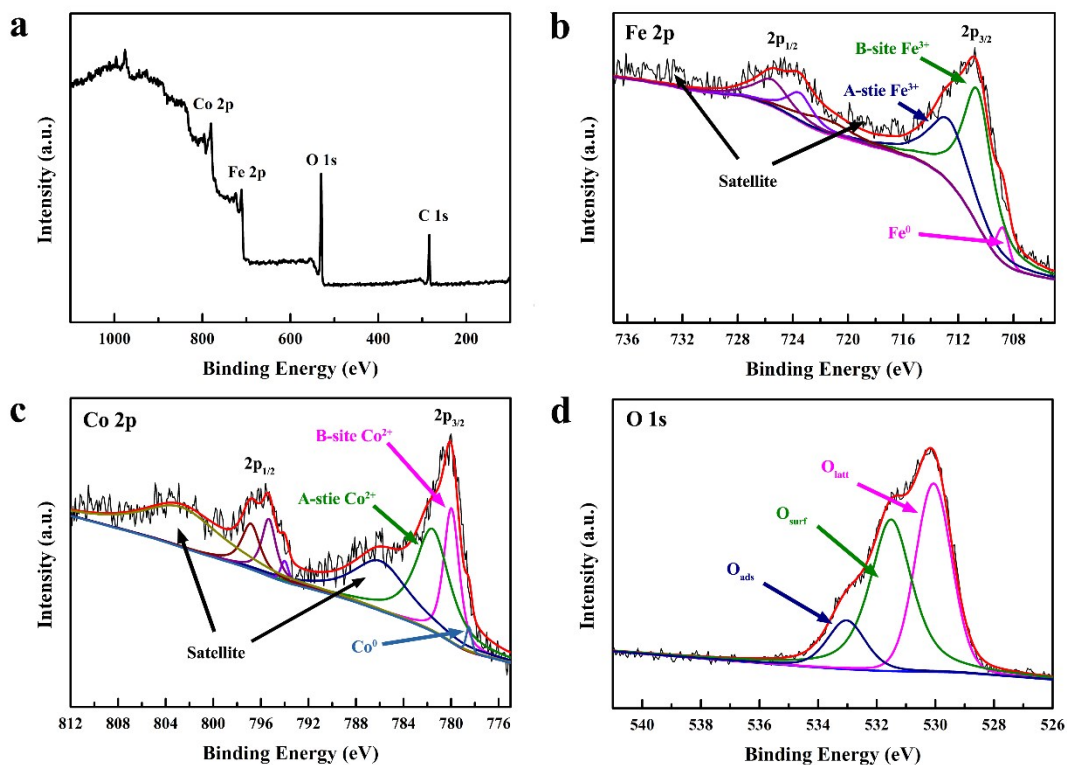

**Fig. S1** X-ray photoelectron spectroscopy of CoFe/CoFe<sub>2</sub>O<sub>4</sub> composite after ten cycles of PMS activation for the degradation of Orange II: a) a survey spectrum, b) Fe 2p peaks, c) Co 2p peaks, d) O 1s peaks.

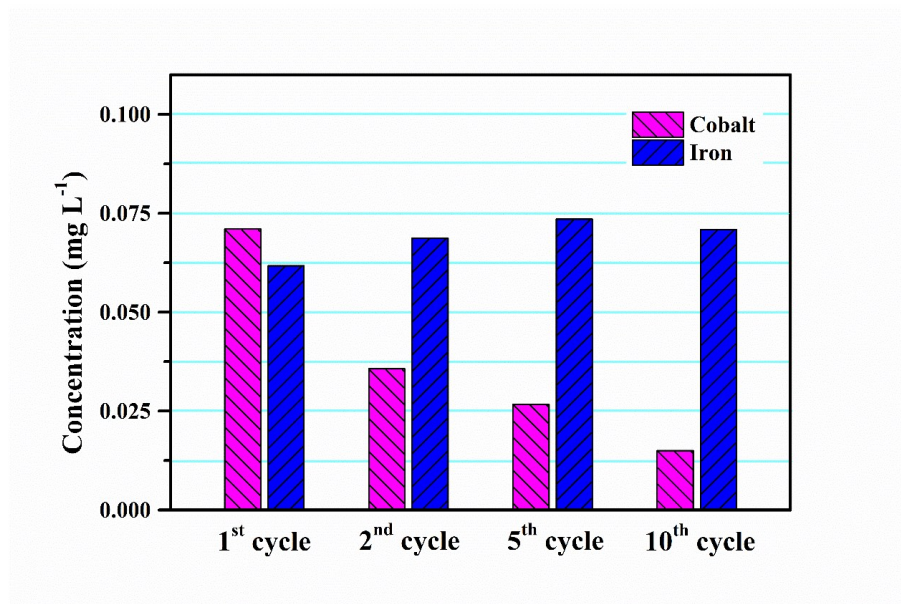

**Fig. S2** Concentrations of dissolved Cobalt and Iron leached from CoFe/CoFe<sub>2</sub>O<sub>4</sub> composite at 5 min in the 1<sup>st</sup>, 2<sup>nd</sup>, 5<sup>th</sup> and 10<sup>th</sup> cycles. (Degradation reaction conditions: [Orange II]=60 mg L<sup>-1</sup>, [PMS]=1.5 g L<sup>-1</sup>, [catalyst]=0.05 g L<sup>-1</sup>, pH=7.0 and T=20 °C.)

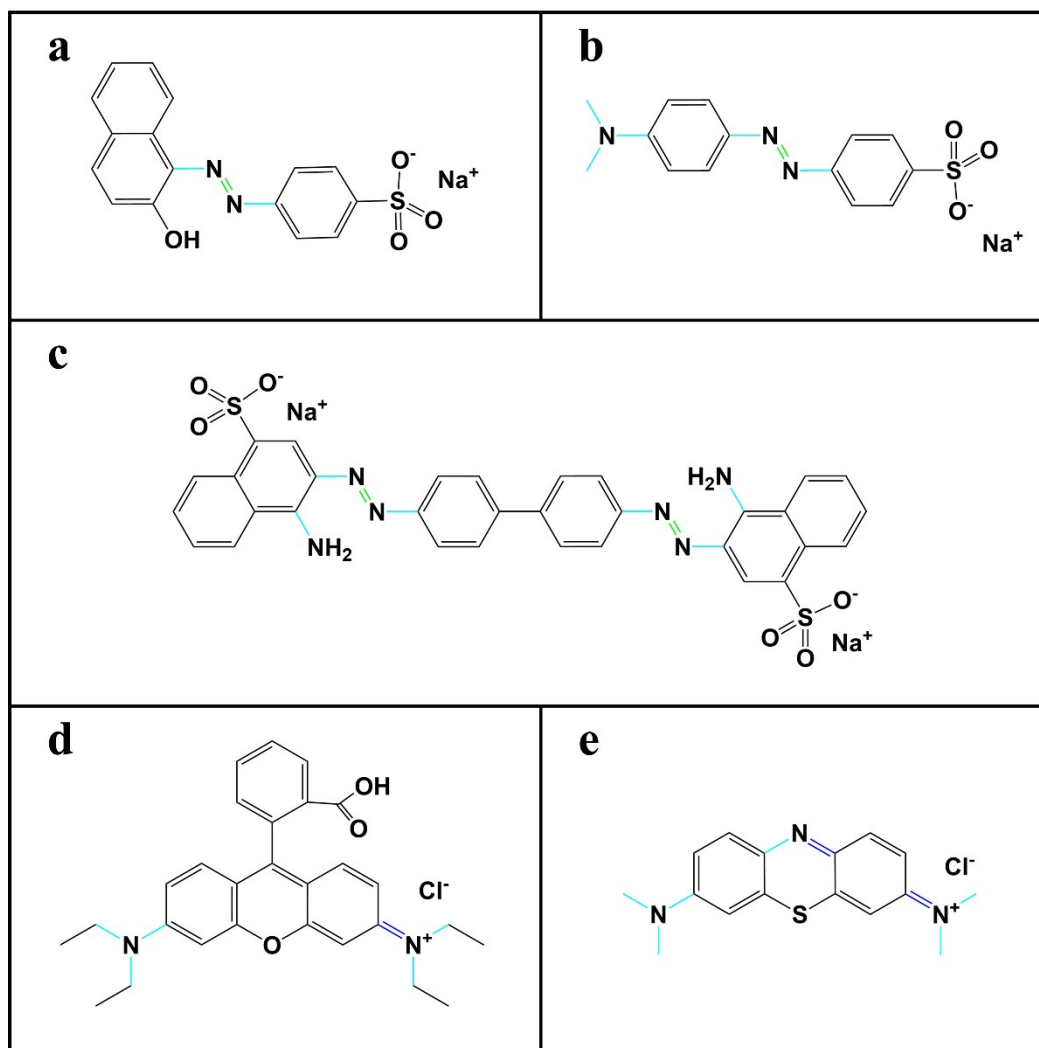

**Fig. S3** Molecular structures: a) Orange II, b) Methyl Orange, c) Congo Red, d) Rhodamine B and e) Methylene Blue.

**Table S1** Numbers of C=N double bond, N=N double bond and C-N bond in the five dyes.

| Bond (Bonding energy) | C=N (615 kJ mol <sup>-1</sup> ) | N=N (418 kJ mol <sup>-1</sup> ) | C-N (293 kJ mol <sup>-1</sup> ) |
|-----------------------|---------------------------------|---------------------------------|---------------------------------|
| Orange II             | 0                               | 1                               | 2                               |
| Methyl Orange         | 0                               | 1                               | 5                               |
| Congo Red             | 0                               | 2                               | 6                               |
| Rhodamine B           | 1                               | 0                               | 5                               |
| Methylene Blue        | 2                               | 0                               | 6                               |
